# Supplementary material
Source: publisher site journal article supplement (https://www.dovepress.com/article/566518)
Supplement: Supplementary file 1 [file 566518%20Additional%20Material.docx]

**Additional Table 1**. The quality of included studies in meta-analysis based on the Newcastle-Ottawa scale Study quality of cohort studies

| **Author (Year)** | **Representativeness of the exposed cohort** | **Selection of the non exposed cohort** | **Ascertainment of exposure** | **Demonstration that outcome of interest was not present at start of study** | **Comparability of cohorts on the basis of the design or analysis** | **Assessment of outcome** | **Was follow-up long enough for outcomes to occur** | **Adequacy of follow up of cohorts** | **Total scores** |
| --- | --- | --- | --- | --- | --- | --- | --- | --- | --- |
| Jing Fan(2024) 24 | ★ | ★ | ★ | ★ | ★★ | ★ | ★ | ☆ | 8 |
| Yunus Çolak(2024) 25 | ★ | ★ | ★ | ★ | ★★ | ★ | ★ | ★ | 9 |
| Žarko Vrbica(2023) 26 | ★ | ☆ | ★ | ★ | ★ | ★ | ★ | ☆ | 6 |
| Miguel J. Divo(2023) 27 | ★ | ★ | ★ | ★ | ★ | ★ | ★ | ★ | 8 |
| Ben-Gary Harvey(2015) 28 | ★ | ★ | ★ | ★ | ★★ | ★ | ★ | ★ | 9 |
| Hye Jung Park(2018) 29 | ★ | ★ | ★ | ★ | ★ | ★ | ★ | ☆ | 7 |
| Yong Suk Jo(2024) 30 | ★ | ★ | ★ | ★ | ★★ | ★ | ★ | ☆ | 8 |
| Dinh S Bui,(2018) 31 | ★ | ★ | ★ | ★ | ★ | ★ | ★ | ★ | 8 |
| SpyridonFortis(2020) 32 | ★ | ★ | ★ | ★ | ★★ | ☆ | ★ | ★ | 8 |
| Mehrdad Arjomandi(2019) 33 | ★ | ★ | ★ | ★ | ★★ | ★ | ★ | ☆ | 8 |
| Stefano Guerra(2009) 34 | ★ | ★ | ★ | ★ | ★★ | ★ | ★ | ★ | 9 |
| Nathan Yee(2022) 35 | ★ | ★ | ★ | ★ | ★★ | ★ | ★ | ☆ | 8 |
| Daniel H Higbee(2022) 36 | ★ | ★ | ★ | ★ | ★★ | ★ | ★ | ☆ | 8 |
| Yunus Çolak(2021) 3 | ★ | ★ | ★ | ★ | ★★ | ★ | ★ | ★ | 9 |
| Russell G. Buhr(2022) 37 | ★ | ★ | ★ | ★ | ★★ | ★ | ★ | ★ | 9 |
| Fan Wu(2024) 38 | ★ | ★ | ★ | ★ | ★★ | ★ | ☆ | ★ | 8 |
| Rina Kanetake(2022) 40 | ☆ | ★ | ★ | ★ | ★ | ★ | ★ | ☆ | 6 |
| Lystra P. Hayden(2015) 42 | ★ | ★ | ★ | ☆ | ★ | ★ | ★ | ★ | 7 |
| NaraTagiyeva(2016) 39 | ★ | ★ | ★ | ★ | ★★ | ★ | ★ | ★ | 9 |
| Do Sun Kwon(2020) 43 | ★ | ★ | ★ | ★ | ★ | ★ | ★ | ☆ | 7 |
| Siyang Zeng(2019) 41 | ★ | ★ | ★ | ★ | ★ | ★ | ★ | ☆ | 7 |

Note：Study quality was assessed using the Newcastle–Ottawa Scale (NOS) for cohort studies. The total NOS score (range 0–9) was used to classify studies as high- (≥7), moderate- (5–6), or lower-quality (<5). Scoring for individual items is denoted by stars: a filled star (★) indicates the item criterion was met (score=1), while the absence of a star (or an open symbol) indicates it was not met (score=0). For the comparability item only, a maximum of two stars can be awarded: ★★ indicates control for at least two major confounders (e.g., age, smoking); ★ indicates control for one major confounder.

**Additional Table 2.** Results of sensitivity analysis

| Study omitted | Estimate | [95% Conf. Interval] |
| --- | --- | --- |
| Yunus Çolak (2024) 25 | 0.20 | 0.14 0.25 |
| Ben-Gary Harvey (2015) 28 | 0.20 | 0.15 0.26 |
| Hye Jung Park (2018) 29 | 0.22 | 0.16 0.28 |
| Yong Suk Jo (2024) 30 | 0.22 | 0.16 0.28 |
| Dinh S Bui (2018) 31 | 0.21 | 0.15 0.27 |
| Spyridon Fortis (2020) 32 | 0.20 | 0.15 0.25 |
| Mehrdad Arjomandi (2019) 33 | 0.21 | 0.15 0.26 |
| Daniel H Higbee (2022) 36 | 0.21 | 0.15 0.28 |
| Yunus Çolak (2021) 3 | 0.21 | 0.15 0.27 |
| Russell G. Buhr (2022) 37 | 0.17 | 0.12 0.21 |
| Fan Wu (2024) 38 | 0.20 | 0.14 0.25 |
| Rina Kanetake (2022) 40 | 0.22 | 0.16 0.27 |
| Do Sun Kwon (2020) 43 | 0.19 | 0.14 0.24 |

**Additional Table 3 Summary Table of Key Characteristics Across Studies**

| **Author (Year)** | **Research subjects** |
| --- | --- |
| Jing Fan(2024) 24 | Individuals without COPD (post‑BD FEV₁/FVC ≥ 0.70); various potential pre‑COPD indicators were assessed, including chronic bronchitis, PRISm, low PEF, small‑airway dysfunction (sSAD), low MMEF, low FEF₅₀/FEF₇₅, etc. |
| Yunus Çolak(2024) 25 | Individuals without airflow limitation (FEV₁/FVC ≥ 0.7) and with at least one of: chronic bronchitis, PRISm (FEV₁ or FVC < 80% predicted), or early airflow limitation (FEV₁/FVC < LLN). Adults aged 20–50 years with FEV₁/FVC ≥ 0.70; pre‑COPD/susceptibility states included: chronic bronchitis (preserved FEV₁/FVC and FEV₁ ≥ 80% predicted), PRISm (FEV₁/FVC > 0.70 and > LLN, but FEV₁ and/or FVC < 80% predicted), and early airflow limitation (FEV₁/FVC > 0.70 but < LLN). |
| Žarko Vrbica(2023) 26 | Individuals with existing structural lung abnormalities and/or physiological impairment, but not yet meeting the criteria for airflow obstruction. |
| Miguel J. Divo(2023) 27 | High‑risk smokers without airflow obstruction at baseline (post‑bronchodilator FEV₁/FVC ≥ 0.7 and FEV₁ ≥ 80% predicted). The study assessed risk factors such as FEV₁/FVC close to the lower limit of normal, pack‑years of smoking, chronic bronchitis, and BMI in relation to incident chronic airflow limitation/COPD. |
| Ben-Gary Harvey(2015) 28 | Current smokers with preserved post‑bronchodilator spirometry (FEV₁/FVC ≥ 0.7 and FEV₁ ≥ 80% predicted) but with reduced diffusion capacity (DLco < 80% predicted). |
| Hye Jung Park(2018) 29 | Preserved ratio impaired spirometry (PRISm), defined as FEV₁/FVC ≥ 0.7 with FEV₁ < 80% predicted. |
| Yong Suk Jo(2024) 30 | Individuals without airflow obstruction (FEV₁/FVC ≥ 0.7 and FEV₁ ≥ 80% predicted) but with either: (1) imaging abnormalities (e.g., bullae, emphysema, or hyperinflation suggestive of air trapping); or (2) respiratory symptoms, including chronic bronchitis (cough and phlegm for >3 months/year for ≥2 years) or dyspnea. |
| Dinh S Bui,(2018) 31 | Based on long‑term FEV₁ trajectories from childhood to mid‑adulthood. Identified three adverse trajectories (early below average with accelerated decline, persistently low, below average). |
| SpyridonFortis(2020) 32 | A subgroup within a PRISm population with the lowest quartile of FVC/TLCCT ratio ("very low" group), showing increased gas trapping and emphysema on CT. |
| Mehrdad Arjomandi(2019) 33 | Individuals with a smoking history (≥20 pack‑years) and preserved lung function (post‑bronchodilator FEV₁/FVC ≥ 0.7, FVC ≥ lower limit of normal) but with evidence of gas trapping on CT imaging (e.g., elevated RVCT/TLCCT). |
| Stefano Guerra(2009) 34 | Individuals with baseline lung function not indicating airflow obstruction (FEV₁/FVC ≥ 70%) but with chronic bronchitis symptoms (cough and phlegm on most days for at least 3 months per year for two consecutive years). |
| Nathan Yee(2022) 35 | Individuals with normal baseline lung function (post‑bronchodilator FEV₁/FVC ≥ 0.7) and a smoking history (≥20 pack‑years), in whom FEV₃/FEV₆ below the lower limit of normal was defined as early airflow abnormality. |
| Daniel H Higbee(2022) 36 | Preserved ratio impaired spirometry (PRISm), i.e., FEV₁/FVC ≥ 0.7 with FEV₁ < 80% predicted. |
| Yunus Çolak(2021) 3 | Adults aged < 50 years with FEV₁/FVC below the lower limit of normal (LLN) but still ≥ 0.70, excluding individuals with baseline FEV₁/FVC < 0.70 (i.e., COPD). |
| Russell G. Buhr(2022) 37 | Individuals with a smoking history (≥20 pack‑years) whose lung function showed pre‑bronchodilator FEV₁/FVC < 0.70 but post‑bronchodilator FEV₁/FVC ≥ 0.70, i.e., "variable airflow obstruction." |
| Fan Wu(2024) 38 | Among individuals with preserved baseline lung function (post‑bronchodilator FEV₁/FVC ≥ 0.70), those whose pre‑bronchodilator FEV₁/FVC was < 0.70 but post‑bronchodilator FEV₁/FVC was ≥ 0.70 were defined as having variable airflow obstruction. |
| Rina Kanetake(2022) 40 | Preserved ratio impaired spirometry (PRISm), defined as FEV₁/FVC ratio above the lower limit of normal (LLN) with percent predicted FEV₁ (%FEV₁) below 80%. |
| Lystra P. Hayden(2015) 42 | Although the term "pre‑COPD" was not explicitly used, this prospective cohort study demonstrated that a history of childhood pneumonia was significantly associated with lower adult lung function, chronic bronchitis symptoms, airway wall thickening on CT, and increased COPD risk in smokers. |
| NaraTagiyeva(2016) 39 | The term "pre‑COPD" was not directly employed. However, the long‑term follow‑up showed that a history of childhood asthma or wheezy bronchitis was associated with persistently lower lung function and a significantly increased risk of COPD in adulthood, aligning with the concept of pre‑COPD as a high‑risk, preclinical state with sustained lung function abnormality. |
| Do Sun Kwon(2020) 43 | Low FEF₂₅₋₇₅% group: individuals aged ≥40 years with normal baseline lung function (FEV₁/FVC ≥ 0.7, FVC ≥ 80% predicted, FEV₁ ≥ 80% predicted) and FEF₂₅₋₇₅% z‑score < –0.8435. |
| Siyang Zeng(2019) 41 | Abnormal RV/TLC group: individuals aged >40 years with a smoking history and preserved baseline lung function (defined as FEV₁/FVC and FEV₁ above the lower limit of normal, without restrictive lung disease), with a residual volume to total lung capacity ratio above the upper limit of normal (RV/TLC > ULN). |

**
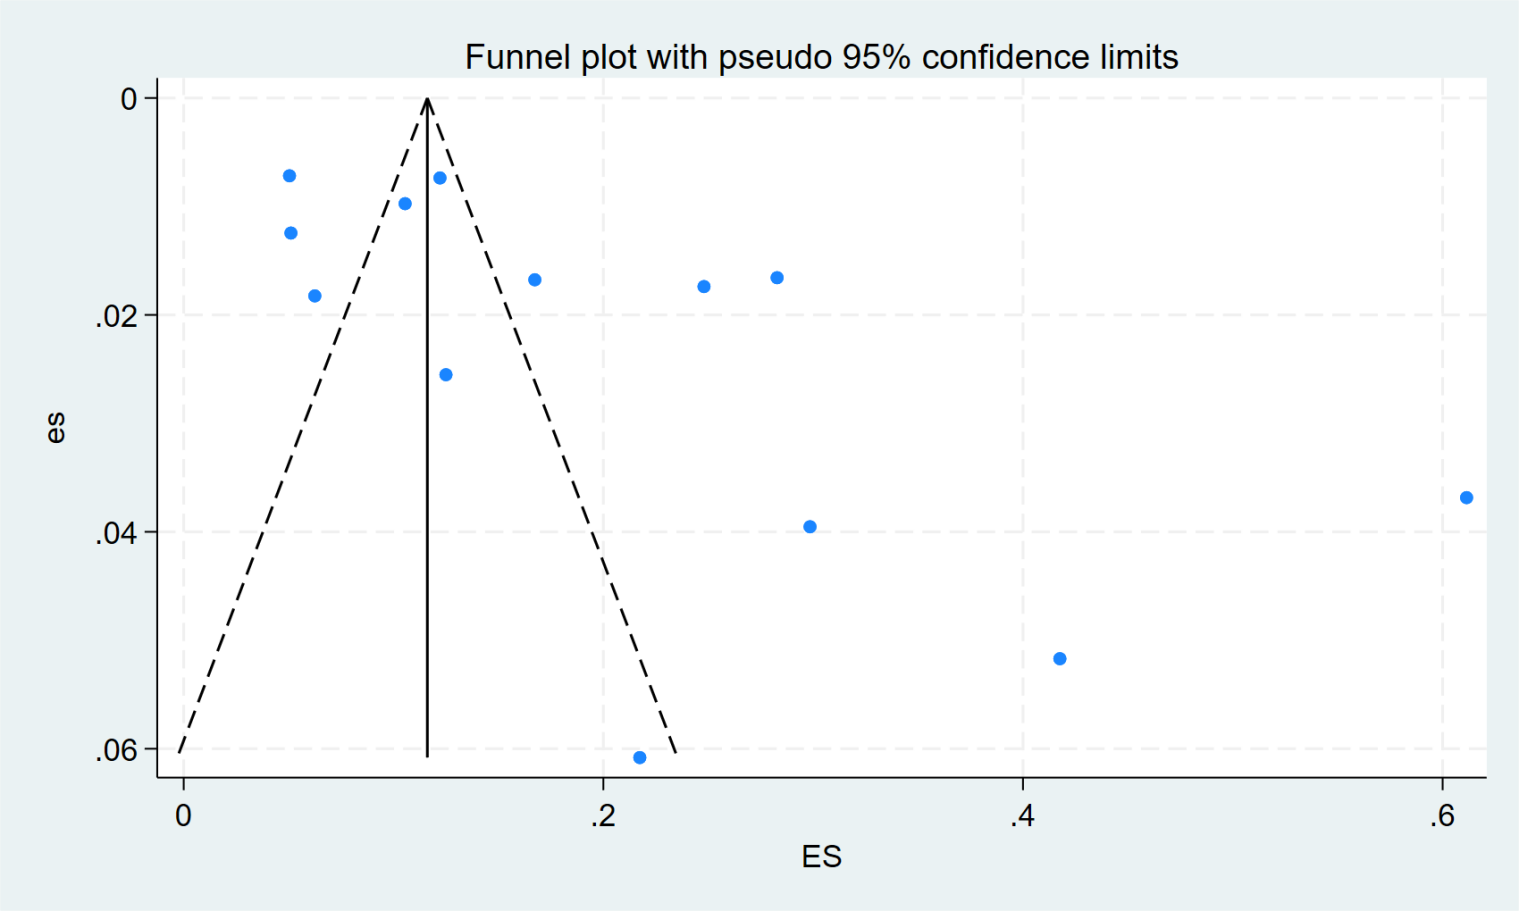
**

**Additional Figure 1 **Funnel plot of the incidence of progression from pre-COPD to COPD** 3,25,28-33,36-38,40,43 **(n = 13)****
